1 **Title:**

2 Development of meta-prompts for Large Language Models to screen titles and abstracts for  
3 diagnostic test accuracy reviews

4

5 **Authors:**

6 Yuki Kataoka, Ryuhei So, Masahiro Banno, Junji Kumasawa, Hidehiro Someko, Shunsuke  
7 Taito, Teruhiko Terasawa, Yasushi Tsujimoto, Yusuke Tsutsumi, Yoshitaka Wada, Toshi  
8 A. Furukawa

9

10 Yuki Kataoka

11 ORCID 0000-0001-7982-5213

12 Department of Internal Medicine, Kyoto Min-iren Asukai Hospital, Kyoto, Japan

13 Scientific Research Works Peer Support Group (SRWS-PSG), Osaka, Japan

14 Section of Clinical Epidemiology, Department of Community Medicine, Kyoto University  
15 Graduate School of Medicine, Kyoto, Japan

16 Department of Healthcare Epidemiology, Kyoto University Graduate School of Medicine /  
17 School of Public Health, Kyoto, Japan

18

19 Ryuhei So

20 ORCID 0002-9838-350X

21 Department of Psychiatry, Okayama Psychiatric Medical Center, Okayama, Japan

22 CureApp, Inc., Tokyo, Japan

23 Scientific Research WorkS Peer Support Group (SRWS-PSG), Osaka, Japan

24

25 Masahiro Banno

26 ORCID 0002-2539-1031

27 Department of Psychiatry, Seichiryō Hospital, Nagoya, Japan

1 Department of Psychiatry, Nagoya University Graduate School of Medicine, Nagoya, Japan  
2 Scientific Research WorkS Peer Support Group (SRWS-PSG), Osaka, Japan  
3  
4 Junji Kumasawa  
5 ORCID 0000-0003-4619-945X  
6 Human Health Sciences, Kyoto University Graduate School of Medicine  
7 Department of Critical Care Medicine, Sakai City Medical Center  
8  
9 Hidehiro Someko  
10 ORCID 0000-0002-7195-2055  
11 Department of General Internal Medicine, Asahi General Hospital, I 1326, Asahi, Chiba,  
12 289-2511, Japan  
13 Scientific Research WorkS Peer Support Group (SRWS-PSG), Osaka, Japan  
14  
15 Shunsuke Taito  
16 ORCID 0000-0003-1218-4225  
17 Division of Rehabilitation, Department of Clinical Practice and Support, Hiroshima  
18 University Hospital, Kasumi 1-2-3, Minami-ku, Hiroshima, 734-8551, Japan  
19 Scientific Research Works Peer Support Group (SRWS-PSG), Osaka, Japan  
20  
21 Teruhiko Terasawa  
22 Section of General Internal Medicine, Department of Emergency and General Internal  
23 Medicine, Fujita Health University School of Medicine, Toyoake, Aichi, Japan  
24  
25 Yasushi Tsujimoto  
26 ORCID 0002-7214-5589  
27 Oku medical clinic, Osaka, Japan

1 Department of Health Promotion and Human Behavior, Kyoto University Graduate School  
2 of Medicine / School of Public Health, Kyoto University, Kyoto, Japan.  
3 Scientific Research WorkS Peer Support Group (SRWS-PSG), Osaka, Japan  
4  
5 Yusuke Tsutsumi  
6 ORCID 0002-9160-0241  
7 Department of Emergency Medicine, National Hospital Organization Mito Medical Center,  
8 280 Sakuranosato Ibarakimachi Higashiibarakigun, Ibaraki, 311-3117, Japan  
9 Human Health Science, Kyoto University Graduate School of Medicine, Kyoto, Japan  
10 Scientific Research WorkS Peer Support Group (SRWS-PSG), Osaka, Japan  
11  
12 Yoshitaka Wada  
13 ORCID 0003-2191-3629  
14 Department of Rehabilitation Medicine I, School of Medicine, Fujita Health University,  
15 Aichi, Japan  
16 Scientific Research WorkS Peer Support Group (SRWS-PSG), Osaka, Japan  
17  
18 Toshi A. Furukawa  
19 ORCID 0000-0003-2159-3776  
20 Department of Health Promotion and Human Behavior, Kyoto University Graduate School  
21 of Medicine/School of Public Health, Kyoto, Japan  
22  
23 **Corresponding author:**  
24 Toshi A. Furukawa  
25 ORCID 0000-0003-2159-3776  
26 Department of Health Promotion and Human Behavior, Kyoto University Graduate School  
27 of Medicine/School of Public Health, Kyoto, Japan  
28 Phone: +81-75-753-9491

1 Fax: +81-75-753-4641

2 Email: furukawa@kuhp.kyoto-u.ac.jp

3

4 Acknowledgment

5 The authors underwent editing using GPT-0614. All authors reviewed and edited the final  
6 manuscript. The responsibility for the content of this article rests solely with the authors.

7

8 Funding

9 The application programming interface fee was supported by a JSPS Grant-in-Aid for  
10 Scientific Research (Grant Number 22K15664) provided to YK. The funder played no role  
11 in the study design, data collection and analysis, publication decisions, or manuscript  
12 preparation.

13

## 14 Conflict of interest

15 Yuki Kataoka: none known

16 Ryuhei So: grants from Osake-no-Kagaku Foundation, speaker's honoraria from Otsuka  
17 Pharmaceutical Co., Ltd., Nippon Shinyaku Co., Ltd., and Takeda Pharmaceutical Co., Ltd.,  
18 outside the submitted work.

19 Masahiro Banno: none known

20 Junji Kumasawa: none known

21 Hidehiro Someko: none known

22 Shunsuke Taito: none known

23 Teruhiko Terasawa: none known

24 Yasushi Tsujimoto: none known

25 Yusuke Tsutsumi: none known

26 Yoshitaka Wada: none known

27 Toshi A. Furukawa: TAF reports personal fees from DT Axis, Kyoto University Original,  
28 MSD, SONY and UpToDate, and a grant from Shionogi, outside the submitted work; In

1 addition, TAF has patents 2020-548587 and 2022-082495 pending, and intellectual  
2 properties for Kokoro-app licensed to Mitsubishi-Tanabe.

3

#### 4 **Author Contributions:**

5 YK had full access to all the data in the study and took responsibility for the integrity of the  
6 data and the accuracy of the data analysis. Study concept and design: YK, RS, MB, JK, ST,  
7 TT, YT, YT, YW, and TAF. Acquisition of data: YK. Drafting of the manuscript: YK. All  
8 authors gave final approval of the version to be published and agreed to be accountable for  
9 all aspects of this work.

10

#### 11 **Data Availability Statement:**

12 The data that support the findings of this study are openly available at  
13 (<https://github.com/youkiti/ARE/>).

14

# 1 Hightlights

## 2 **What is already known**

- 3 - Title and abstract screening in systematic reviews (SRs) consumes significant time.
- 4 - Several attempts using machine learning to reduce this process in diagnostic test accuracy
- 5 (DTA) SRs exist, but they have not yielded positive results in external validation.

6

## 7 **What is new**

- 8 - We aimed to develop and externally validate optimized meta-prompt for GPT-3.5-turbo
- 9 and GPT-4 to classify abstracts for DTA SRs.
- 10 - Through an iterative approach across three training datasets, an optimal meta-prompt
- 11 capable of identifying DTA studies with remarkable sensitivity and specificity was
- 12 developed.
- 13 - The accuracy reproduced in the external validation datasets.

14

## 15 **Potential Impact for Readers**

- 16 - The developed meta-prompt can lessen the need for humans to read abstracts for DTA
- 17 SRs, saving significant time and resources.

18

# 1 Abstract

2 Systematic reviews (SRs) are a critical component of evidence-based medicine, but the  
3 process of screening titles and abstracts is time-consuming. This study aimed to develop  
4 and externally validate a method using large language models to classify abstracts for  
5 diagnostic test accuracy (DTA) systematic reviews, thereby reducing the human workload.  
6 We used a previously collected dataset for developing DTA abstract classifiers and applied  
7 prompt engineering. We developed an optimized meta-prompt for Generative Pre-trained  
8 Transformer (GPT)-3.5-turbo and GPT-4 to classify abstracts. In the external validation  
9 dataset 1, the prompt with GPT-3.5 turbo showed a sensitivity of 0.988, and a specificity of  
10 0.298. GPT-4 showed a sensitivity of 0.982, and a specificity of 0.677. In the external  
11 validation dataset 2, GPT-3.5 turbo showed a sensitivity of 0.919, and a specificity of 0.434.  
12 GPT-4 showed a sensitivity of 0.806, and a specificity of 0.740. If we included eligible  
13 studies from among the references of the identified studies, GPT-3.5 turbo had no critical  
14 misses, while GPT-4 had some misses. Our study indicates that GPT-3.5 turbo can be  
15 effectively used to classify abstracts for DTA systematic reviews. Further studies using  
16 other dataset are warranted to confirm our results. Additionally, we encourage the use of  
17 our framework and publicly available dataset for further exploration of more effective  
18 classifiers using other LLMs and prompts (<https://github.com/youkiti/ARE/>).

19

## 20 **Keywords:**

21 Systematic review, Machine learning, Search filter, Diagnostic test accuracy, Large  
22 language models.

23

24

25 **Word counts: 2612 words**

26

# 1. Introduction

Title and abstract screening in systematic reviews (SRs) requires much time and efforts. Several attempts using machine learning to facilitate this process exist (1,2). Some machine learning models succeeded in intervention and update SRs, but no cases in diagnostic test accuracy (DTA) SRs. In our own previous study, we used the Bidirectional Encoder Representations from Transformers (BERT), which was released in 2018 (3), to develop a model to classify abstracts in DTA SRs. The results were unsatisfactory in the external validation (4).

The launch of Chat Generative Pre-trained Transformer (ChatGPT) in November 2022 has boosted the already high interest in large language models (LLMs) (5). LLMs are machine learning models specifically trained on text data to process and generate human-like text (6). When applying LLMs, there are two techniques: fine tuning and prompt engineering (7). Fine tuning involves training an existing LLM on a new dataset to improve it for a specific task. While this technique is less expensive than creating a new LLM from scratch, it still requires significant time and computational resources. Therefore, more research efforts have been expended on prompt engineering (8–10). Prompt engineering allows for better results from a LLM without additional training by adding what is known as a meta-prompt—a task-specific instruction—in the input. We are aware of one application of prompt engineering to screen references for intervention reviews (11) so far.

However, the accuracy of LLM as a DTA abstract classifier remains uncertain. Our study aimed to develop and externally validate optimized meta-prompts for GPT-3.5-turbo and GPT-4 to classify abstracts for DTA SRs. GPT-3.5-turbo is a version of the GPT model developed by OpenAI. It powers the freely accessible ChatGPT. GPT-4 follows GPT-3.5-turbo as a more advanced model.

25



## 1 2. Methods

### 2 2.1 Preparation of datasets

3 We used the previously collected dataset for developing the DTA abstract classifier (11).  
4 We defined a DTA study as an original study that evaluated a test against a clinical  
5 reference standard for humans (13). We classified multivariable diagnostic prediction  
6 model studies as DTA studies, but prognostic prediction model studies, that measured  
7 predictors and outcomes at different time points as non-DTA studies (14). We classified  
8 modeling studies, studies that assessed diagnostic training for medical professionals, and  
9 case series (e.g., studies without controls, such as following polymerase chain reaction  
10 results of specific patients) as non-DTA studies.

11 We retrieved various DTA systematic reviews (SRs) from the EPPI-Centre COVID-  
12 19: a living systematic map of the evidence (12). These systematic reviews addressed  
13 malignancy, gastrointestinal disorders, respiratory disorders, emergency care, neurology,  
14 and infectious disease.

15 The dataset consisted of Microsoft Excel files, including serial numbers, titles,  
16 abstracts, and binary reference labels of true (DTA) and false (non-DTA) values. As the  
17 reference standard, we used the abstract lists that required manual full-text review when the  
18 original DTA SR was conducted. As an additional analysis, we used the included articles  
19 after the full-text review as the reference standard in the external validation dataset 2. We  
20 used titles and abstracts as predictors.

21 From 67,979 abstracts used in our previous study (4), which contained 1,575 DTA  
22 study abstracts, we conducted stratified sampling for the train dataset 1 (n = 100, 25 DTA  
23 abstracts, and 75 non-DTA abstracts). (Figure 1) In addition, we randomly sampled the  
24 train dataset 2 (n = 500), and the train dataset 3 (n = 1,000) from among the 1575 DTA  
25 studies. These three datasets were used for the development of a meta-prompt to select  
26 DTA abstracts. We limited the number of abstracts in the train datasets to decrease data  
27 processing time and cost. For external validation of the meta-prompt, we used the same

1 dataset including 7,721 abstracts, including 166 DTA abstracts as used in the previous  
2 study (external validation dataset 1) (15). In addition, we used another dataset including  
3 1023 abstracts and 124 DTA abstracts from a DTA SR (external validation dataset 2) (16).

4

## 5 2.2 Overview of four-step approach for abstract screening enhancement

6 In this study, we undertook a four-step approach for abstract review enhancement of  
7 diagnostic test accuracy (DTA) abstracts. First, we began by developing a meta-prompt  
8 using the Azure OpenAI application programming interface (API), optimizing it for  
9 accurate labeling of DTA abstracts (17). Second, we explored the optimal temperature  
10 setting for the meta-prompt to achieve the desired outputs. The temperature is the parameter  
11 that controls the randomness of the GPT (15). Third, we conducted an external validation  
12 using two datasets. Fourthly, we assessed the reproducibility of the model's outputs and  
13 iterative accuracy enhancement (Figure 2).

14

## 15 2.3 Step 1: Development of a meta-prompt for selecting DTA abstracts

16 We used Azure OpenAI API which provides access to GPT-3.5 turbo and GPT-4. The input  
17 included a meta-prompt, a title and an abstract, and the temperature parameter. The meta-  
18 prompt was to label whether the inputted abstracts were DTA abstracts or not. One title-  
19 and-abstract was retrieved from each line of dataset. The temperature is the parameter that  
20 controls the randomness of the GPT (18). The temperature has a valid range from 0.0  
21 inclusive to 2.0 exclusive. Higher values will make output more random while lower values  
22 will make results more focused and deterministic. We set the temperature as 0 for the  
23 accurate labeling. The output was a label of true or false. We used GPT-3.5 turbo to  
24 develop a meta-prompt (Figure 2 and 3).

25 From the predicted label, we calculated the sensitivity and the specificity and the  
26 proportion of error as performance measures. Then we asked the GPT-3.5 turbo to improve  
27 the meta-prompt (Figure 2). The improvement meta-prompt was as follows:

1 Please become my prompt engineer. Your goal is to help me create the best prompts  
2 for systematic review of diagnostic test accuracy. The prompts will be used by you,  
3 ChatGPT. Please rewrite inputted meta-prompt to achieve sensitivity  $> 0.9$  and  
4 specificity  $> 0.4$  and error proportion  $< 0.1$ .

5 We selected the above cutoffs based on a previous study that investigated the  
6 search filters for systematic reviews (19). The error meant that when a response other than  
7 true or false occurs three times in an abstract, which included communication errors.

8 Firstly, we ran the experiment 10 times with the train dataset 1 and chose the best  
9 one. Secondly, we ran the experiment 10 times with the train dataset 2 and chose the best  
10 one. Thirdly, we tested with the train dataset 3.

11

#### 12 2.4 Step 2: Explore the optimal temperature

13 As mentioned above, the temperature was set to 0 in the Step 1. To explore the optimal  
14 temperature, we used the optimal meta-prompt and changed temperature as 0,0.4,0.8, 1.2,  
15 and 1.6. We evaluated the results with sensitivity, specificity, and error proportion (Figure  
16 2).

17

#### 18 2.5 Step 3: External validation

19 For the external validation, we used the optimal meta-prompt developed in the step 1 with  
20 the external validation dataset 1 and 2. We used GPT-3.5 turbo and GPT-4. We evaluated  
21 the results with sensitivity, specificity, error proportion, and number needed to screen  
22 (Figure 2). Number needed to screen is the number to identify 1 reference to undergo full-  
23 text screening during title and abstract screening (20). For the external validation dataset 2,  
24 we assessed the accuracy using abstracts deemed 'true' after a full-text review by human  
25 experts as the reference standard (RS2). Additionally, we examined the characteristics of  
26 abstracts that turned out to be false negatives for the RS2.

27

1 2.6 Step 4: Check for reproducibility

2 Large language models like GPT have inherent non-determinism (21,22). Outputs remain  
3 non-deterministic, even at a temperature of 0 (23). Hence, we checked the reproducibility  
4 of GPT-3.5 turbo and GPT-4 using the same meta-prompt ten times for the external  
5 validation dataset 1 and 2 (Figure 2).

6 For the external validation dataset 2, we evaluated the performance enhancement  
7 when combining results by considering an abstract as 'true' if it was deemed 'true' in at least  
8 one of the ten trials.

9

10 2.7 Development environment

11 We used Google Collaboratory, a Python-based data analysis and machine learning tool  
12 that can be executed in a web browser (24). We used the Azure OpenAI API version "2023-  
13 07-01-preview". We used "gpt-35-turbo-0613" as GPT-3.5 turbo, "gpt4-0613" as GPT-4.  
14 Our code and datasets are made available at GitHub (<https://github.com/youkiti/ARE/>).

15

## 3. Results

### 3.1 Step 1: Development of a meta-prompt for selecting DTA abstracts

We developed the first meta-prompt and improved the meta-prompt ten times with the training dataset 1 (n = 100). Then selected the #8 prompt based on the balance of sensitivity and specificity (Table 1, Supplemental table 1).

Using the #8 meta-prompt, we improved the meta-prompt with the training dataset 2 (n = 500) (Table 2). The #3 prompt achieved a sensitivity of 0.917, a specificity of 0.527, and an error proportion of 0.010.

We tested the #3 meta-prompt with the training dataset 3 (n = 1000). The prompt achieved a sensitivity of 0.913, a specificity of 0.416, and an error proportion of 0.000. To enhance the prompt, we omitted the numbers for the thresholds of sensitivity and specificity. The final meta-prompt was as follows:

Please determine if an abstract is a Diagnostic Test Accuracy (DTA) study based on the following criteria:

1. A DTA study evaluates a test against a clinical reference standard specifically for humans, with very high sensitivity and reasonable specificity.
2. Include multivariable diagnostic prediction model studies.
3. Exclude the following:
  - Prognostic prediction model studies where predictors and outcomes are measured at different time points.
  - Modeling studies.
  - Studies assessing diagnostic training for medical professionals.

Reply with 'True' if the abstract is a DTA study or if there is insufficient information to judge (e.g., when only a title is available). Reply with 'False' if you are certain that the abstract is not a DTA study.

In the training dataset 3, the prompt achieved a sensitivity of 0.938, a specificity of 0.514, and an error proportion of 0.010 (Table 3).

### 3.2 Step 2: Explore the optimal temperature

We observed a decrease in sensitivity as the temperature increased (Table 3).

### 3.3 Step 3: External validation

For the final meta-prompt tested on the external validation dataset 1, GPT-3.5 turbo showed a sensitivity of 0.988, a specificity of 0.298, and an error rate of 0.008, while GPT-4 showed a sensitivity of 0.982, a specificity of 0.677, and an error proportion of 0.008. For the final meta-prompt tested on the external validation dataset 2, GPT-3.5 turbo showed a sensitivity of 0.919, a specificity of 0.434, and an error proportion of 0.005, while GPT-4 showed a sensitivity of 0.806, a specificity of 0.740, and an error proportion of 0.008 (Table 4).

On the external validation dataset 1, the baseline number needed to screen was 46.5. The number reduced to 33.3 with GPT-3.5 turbo, and to 16.0 with GPT-4. In external validation dataset 2, the number needed to screen reduced from 8.25 to 5.45 with GPT-3.5 turbo, and to 3.34 with GPT-4.

When we used the included articles after the full-text review as the reference standard (RS2), in the external validation dataset 2, GPT-3.5 turbo showed a sensitivity of 0.963 and a specificity of 0.406, while GPT-4 showed a sensitivity of 0.889 and a specificity of 0.689. In other words, GPT-3.5 missed one abstract from 27 abstracts included in the reviews and GPT-4 missed three abstracts. The one abstract that GPT-3.5 turbo missed (25) was referenced in another included article (26). Two of three abstracts that GPT-4 missed were not detectable by citation search of included articles (27,28).

### 3.4 Step 4: Check for reproducibility

We observed no remarkable differences in sensitivity, specificity, and error proportion between GPT-4 and GPT-3.5 in both external validation datasets during the ten experiments (Table 4 and 5).

As a result of combining multiple evaluations for one abstract, we observed the minimal improvement in the external validation dataset 2 using GPT-3.5 turbo and GPT-4 (Table 6).

## 4. Discussion

We developed and externally validated the meta-prompt to classify abstracts for new DTA systematic reviews. Through an iterative approach across three training datasets, we developed an optimal meta-prompt capable of identifying DTA studies with remarkable sensitivity and specificity. The temperature parameter, when set to 0, demonstrated the best performance. In the external validation dataset 1, using the same meta-prompt, GPT-3.5 turbo and GPT-4 showed almost the same sensitivity and error proportion. In the external validation dataset 2, GPT-3.5 and GPT-4 showed worse sensitivity. However, combining citation search, GPT-3.5 turbo had no substantive misses. GPT-4 had some misses. As a result of the check for reproducibility, we observed no remarkable differences in results across the 10 serial experiments. Combining multiple evaluations for one abstract did not notably improve performance.

Our results are better than in our previous study that used machine learning. In our research using the fine-tuned model of BERT, the sensitivity in the external validation set was less than 0.4 (26). In this study, both GPT-3.5 turbo and GPT-4 achieved a sensitivity exceeding 0.96. The performance is equivalent to existing RCT search filters (19). GPT-3.5 turbo had similar or better sensitivity, while GPT-4 demonstrated better specificity. Regarding time and cost, as of October 2023, using GPT-3.5 turbo API on the fastest

setting of S0 Standard Azure took 1 min 18 seconds to process 100 abstracts and 0.09 dollars cost. In contrast, GPT-4 API took 2 min 44 seconds and 1.7 dollars cost.

Our results indicate a lack of strict reproducibility in outputs of LLMs, even with zero temperature settings in binary labeling tasks. In other words, occasionally, LLMs produce different outputs from the same input. However, the lack of reproducibility is the same even when a human makes the abstract review. In fact, if the same person classifies abstracts one week later, the results do not necessarily match (29). Drawing parallels to epidemiological studies, it's worth noting that LLMs inherently involve measurement errors (30). The precise nature of the inconsistency of LLMs, be it systematic or random, remains unclear. To effectively assess the performance of LLMs, understanding the non-deterministic nature will help address this issue. Reflecting on our research objectives, the variability in judgment did not substantially affect the sensitivity.

We position our study as a type of prompt engineering by the LLM itself. Researchers are exploring a framework to enhance meta-prompts by presenting specific tasks and meta-prompts and their scores to the LLM. Researchers have applied this framework to mathematical problems (31) and simple natural language processing tasks (32,33). In systematic reviews, the potential exists to implement appropriate prompt engineering using LLM for tasks where the dataset can provide correct answers.

Our study has several limitations. Firstly, we have yet to validate our findings on other datasets. Future studies are warranted to test our results on alternative datasets to ascertain the generalizability of our conclusions. Secondly, there remains an unanswered question regarding the efficacy of the meta-prompts in relation to other LLMs. The best meta-prompts might be different for each LLM (34). "Closed" OpenAI LLMs can only be accessed through the API and cannot be downloaded to run on a researchers' computer. Therefore, there is a risk they may change or even become inaccessible in the future. Researchers should have alternative open LLMs that can be run on their own server. Lastly, our current study has scoped its focus predominantly on the study design. For abstract review enhancement, further studies are warranted to determine if a meta-prompt



considering other DTA study elements, such as participants and index tests, can reduce the number needed to screen in new reviews (11).

## 5. Conclusions

In conclusion, we developed and externally validated the meta-prompt to reduce the burden for humans to read abstracts when conducting DTA SRs. Considering situations where cost and sensitivity are prioritized, we recommend systematic reviewers to use GPT-3.5 turbo and our meta-prompt for title and abstract screening of DTA reviews. Further studies using other dataset are warranted to confirm our results.

## Figure and table legends

### Figure 1 Preparation of datasets

n = number of abstracts (number of diagnostic test accuracy abstracts)

Figure 2 Each step to develop, externally validate, and checking for reproducibility of the meta-prompts.

GPT: Generative Pre-trained Transformer

Figure 3 Schema of input and output for large language models

GPT: Generative Pre-trained Transformer

The square below shows an example input and output.

Table 1. Accuracy of meta-prompts for selecting DTA abstracts in the training dataset 1

| Serial | Meta-prompt                                                                                                                                                                                                                                                                                                                                                                                                                                                                                                                                                                                                                                                                                                                                                                                                                                                                                                                                                                           | Sensitivity | Specificity | Error proportion |
|--------|---------------------------------------------------------------------------------------------------------------------------------------------------------------------------------------------------------------------------------------------------------------------------------------------------------------------------------------------------------------------------------------------------------------------------------------------------------------------------------------------------------------------------------------------------------------------------------------------------------------------------------------------------------------------------------------------------------------------------------------------------------------------------------------------------------------------------------------------------------------------------------------------------------------------------------------------------------------------------------------|-------------|-------------|------------------|
| #1     | <p>You are a systematic reviewer reviewing diagnostic test accuracy (DTA) studies. Given an abstract, determine if it is a DTA study based on the following criteria:</p> <ol style="list-style-type: none"> <li>1. A DTA study evaluates a test against a clinical reference standard specifically for humans.</li> <li>2. Accept multivariable diagnostic prediction model studies.</li> <li>3. Exclude the following: <ul style="list-style-type: none"> <li>- Prognostic prediction model studies where predictors and outcomes are measured at different time points.</li> <li>- Modeling studies.</li> <li>- Studies assessing diagnostic training for medical professionals.</li> </ul> </li> </ol> <p>Your response should be 'True' if the abstract is a DTA study or if there is insufficient information to make a judgment (e.g., when only a title is provided). Avoid any oversight. If you are certain that the abstract is not a DTA study, respond with 'False'.</p> | 1.000       | 0.067       | 0.020            |
| #8*    | <p>You are a systematic reviewer reviewing diagnostic test accuracy (DTA) studies. Determine if an abstract is a DTA study based on the following criteria:</p> <ol style="list-style-type: none"> <li>1. A DTA study evaluates a test against a clinical reference standard specifically for humans.</li> <li>2. Accept multivariable diagnostic prediction model studies.</li> <li>3. Do NOT include: <ul style="list-style-type: none"> <li>- Prognostic prediction model studies where predictors and outcomes are measured at different time points.</li> <li>- Modeling studies.</li> <li>- Studies assessing diagnostic training for medical professionals.</li> </ul> </li> </ol> <p>Respond with 'True' if the abstract is a DTA study or if there is not enough information to</p>                                                                                                                                                                                          | 0.960       | 0.413       | 0.040            |

judge (e.g., when only a title is entered).  
Respond with 'False' if you are certain that the  
abstract is not a DTA study.

---

\* The meta-prompt passed for the step 2

† Details of each iteration is shown in the Supplemental table 1

DTA: Diagnostic Test Accuracy

Table 2. Accuracy of meta-prompts for selecting DTA abstracts in the training dataset 2

| Serial | Meta-prompt                                                                                                                                                                                                                                                                                                                                                                                                                                                                                                                                                                                                                                                                                                                                                                                                                                         | Sensitivity | Specificity | Error proportion |
|--------|-----------------------------------------------------------------------------------------------------------------------------------------------------------------------------------------------------------------------------------------------------------------------------------------------------------------------------------------------------------------------------------------------------------------------------------------------------------------------------------------------------------------------------------------------------------------------------------------------------------------------------------------------------------------------------------------------------------------------------------------------------------------------------------------------------------------------------------------------------|-------------|-------------|------------------|
| #1     | <p>Please assess if an abstract is a Diagnostic Test Accuracy (DTA) study based on the following criteria:</p> <ol style="list-style-type: none"> <li>1. A DTA study evaluates a test against a clinical reference standard specifically for humans.</li> <li>2. Include multivariable diagnostic prediction model studies.</li> <li>3. Exclude: - Prognostic prediction model studies where predictors and outcomes are measured at different time points. - Modeling studies. - Studies assessing diagnostic training for medical professionals.</li> </ol> <p>Determine if the abstract is a DTA study. Reply with 'True' if the abstract is a DTA study or if there is insufficient information to judge (e.g., when only a title is available). Reply with 'False' if you are certain that the abstract is not a DTA study.</p>                | 0.750       | 0.547       | 0.002            |
| #2     | <p>Please determine if an abstract is a Diagnostic Test Accuracy (DTA) study based on the following criteria:</p> <ol style="list-style-type: none"> <li>1. A DTA study evaluates a test against a clinical reference standard specifically for humans.</li> <li>2. Include multivariable diagnostic prediction model studies.</li> <li>3. Exclude the following: <ul style="list-style-type: none"> <li>- Prognostic prediction model studies where predictors and outcomes are measured at different time points.</li> <li>- Modeling studies.</li> <li>- Studies assessing diagnostic training for medical professionals.</li> </ul> </li> </ol> <p>Reply with 'True' if the abstract is a DTA study or if there is insufficient information to judge (e.g., when only a title is available). Reply with 'False' if you are certain that the</p> | 0.833       | 0.537       | 0.012            |

---

|     |                                                                                                                                                                                                                                                                                                                                                                                                                                                                                                                                                                                                                                                                                                                                                                                                         |       |       |       |
|-----|---------------------------------------------------------------------------------------------------------------------------------------------------------------------------------------------------------------------------------------------------------------------------------------------------------------------------------------------------------------------------------------------------------------------------------------------------------------------------------------------------------------------------------------------------------------------------------------------------------------------------------------------------------------------------------------------------------------------------------------------------------------------------------------------------------|-------|-------|-------|
|     | abstract is not a DTA study.                                                                                                                                                                                                                                                                                                                                                                                                                                                                                                                                                                                                                                                                                                                                                                            |       |       |       |
| #3* | Please determine if an abstract is a Diagnostic Test Accuracy (DTA) study based on the following criteria: 1. A DTA study evaluates a test against a clinical reference standard specifically for humans, with high sensitivity ( $\geq 0.9$ ) and moderate specificity ( $\geq 0.4$ ). 2. Include multivariable diagnostic prediction model studies. 3. Exclude the following: - Prognostic prediction model studies where predictors and outcomes are measured at different time points. - Modeling studies. - Studies assessing diagnostic training for medical professionals. Reply with 'True' if the abstract is a DTA study or if there is insufficient information to judge (e.g., when only a title is available). Reply with 'False' if you are certain that the abstract is not a DTA study. | 0.917 | 0.527 | 0.010 |

---

\* The meta-prompt passed for the step 3

DTA: Diagnostic Test Accuracy

Table 3. Accuracy of the final meta-prompt at different temperatures with GPT-3.5 turbo in the training dataset 3

| Temperature | Sensitivity | Specificity | Error proportion |
|-------------|-------------|-------------|------------------|
| 0           | 0.938       | 0.514       | 0.010            |
| 0.4         | 0.875       | 0.518       | 0.006            |
| 0.8         | 0.813       | 0.491       | 0.009            |
| 1.2         | 0.813       | 0.480       | 0.025            |
| 1.6         | 0.688       | 0.449       | 0.109            |

GPT: Generative Pre-trained Transformer



Table 4. Reproducibility test from 10 experiments for the external validation dataset 1

| <b>Serial</b> | <b>model</b> | <b>Sensitivity</b> | <b>Specificity</b> | <b>Error proportion</b> |
|---------------|--------------|--------------------|--------------------|-------------------------|
| #1            | GPT-3.5      | 0.988              | 0.298              | 0.008                   |
| #2            | GPT-3.5      | 0.988              | 0.297              | 0.005                   |
| #3            | GPT-3.5      | 0.994              | 0.286              | 0.008                   |
| #4            | GPT-3.5      | 0.982              | 0.288              | 0.009                   |
| #5            | GPT-3.5      | 0.988              | 0.288              | 0.009                   |
| #6            | GPT-3.5      | 0.988              | 0.292              | 0.011                   |
| #7            | GPT-3.5      | 0.994              | 0.289              | 0.011                   |
| #8            | GPT-3.5      | 0.988              | 0.292              | 0.010                   |
| #9            | GPT-3.5      | 0.988              | 0.294              | 0.010                   |
| #10           | GPT-3.5      | 0.994              | 0.295              | 0.010                   |
| #1            | GPT-4        | 0.982              | 0.677              | 0.000                   |
| #2            | GPT-4        | 0.976              | 0.678              | 0.002                   |
| #3            | GPT-4        | 0.976              | 0.677              | 0.002                   |
| #4            | GPT-4        | 0.976              | 0.678              | 0.002                   |
| #5            | GPT-4        | 0.982              | 0.677              | 0.001                   |
| #6            | GPT-4        | 0.988              | 0.679              | 0.000                   |
| #7            | GPT-4        | 0.994              | 0.679              | 0.000                   |
| #8            | GPT-4        | 0.994              | 0.678              | 0.000                   |
| #9            | GPT-4        | 0.982              | 0.678              | 0.000                   |
| #10           | GPT-4        | 0.988              | 0.681              | 0.000                   |

GPT: Generative Pre-trained Transformer

Table 5. Reproducibility test from 10 experiments for the external validation dataset 2

| <b>Serial</b> | <b>model</b> | <b>Sensitivity</b> | <b>Specificity</b> | <b>Error proportion</b> |
|---------------|--------------|--------------------|--------------------|-------------------------|
| #1            | GPT-3.5      | 0.919              | 0.436              | 0.009                   |
| #2            | GPT-3.5      | 0.919              | 0.437              | 0.009                   |
| #3            | GPT-3.5      | 0.927              | 0.438              | 0.011                   |
| #4            | GPT-3.5      | 0.919              | 0.433              | 0.009                   |
| #5            | GPT-3.5      | 0.919              | 0.442              | 0.008                   |
| #6            | GPT-3.5      | 0.919              | 0.438              | 0.008                   |
| #7            | GPT-3.5      | 0.919              | 0.440              | 0.009                   |
| #8            | GPT-3.5      | 0.919              | 0.439              | 0.008                   |
| #9            | GPT-3.5      | 0.919              | 0.435              | 0.009                   |
| #10           | GPT-3.5      | 0.927              | 0.435              | 0.008                   |
| #1            | GPT-4        | 0.806              | 0.740              | 0.000                   |
| #2            | GPT-4        | 0.782              | 0.749              | 0.000                   |
| #3            | GPT-4        | 0.798              | 0.735              | 0.000                   |
| #4            | GPT-4        | 0.790              | 0.746              | 0.000                   |
| #5            | GPT-4        | 0.798              | 0.742              | 0.000                   |
| #6            | GPT-4        | 0.806              | 0.744              | 0.000                   |
| #7            | GPT-4        | 0.806              | 0.750              | 0.000                   |
| #8            | GPT-4        | 0.806              | 0.744              | 0.000                   |
| #9            | GPT-4        | 0.790              | 0.749              | 0.000                   |
| #10           | GPT-4        | 0.806              | 0.742              | 0.000                   |

GPT: Generative Pre-trained Transformer

Table 6. Accuracy of the final meta-prompt when combining the results with GPT-3.5 turbo and GPT-4 in the external validation dataset 2

| Combined experiments<br>count | GPT-3.5 turbo |             | GPT-4       |             |
|-------------------------------|---------------|-------------|-------------|-------------|
|                               | Sensitivity   | Specificity | Sensitivity | Specificity |
| 1                             | 0.919         | 0.446       | 0.806       | 0.740       |
| 2                             | 0.919         | 0.439       | 0.815       | 0.734       |
| 3                             | 0.927         | 0.437       | 0.815       | 0.722       |
| 4                             | 0.927         | 0.434       | 0.815       | 0.721       |
| 5                             | 0.927         | 0.430       | 0.815       | 0.720       |
| 6                             | 0.927         | 0.427       | 0.815       | 0.719       |
| 7                             | 0.927         | 0.427       | 0.823       | 0.717       |
| 8                             | 0.927         | 0.426       | 0.823       | 0.716       |
| 9                             | 0.927         | 0.420       | 0.823       | 0.714       |
| 10                            | 0.935         | 0.419       | 0.823       | 0.714       |

GPT: Generative Pre-trained Transformer

## References

1. van de Schoot R, de Bruin J, Schram R, Zahedi P, de Boer J, Weijdemans F, et al. An open source machine learning framework for efficient and transparent systematic reviews. *Nat Mach Intell*. 2021 Feb 1;3(2):125–33.
2. Tsou AY, Treadwell JR, Erinoff E, Schoelles K. Machine learning for screening prioritization in systematic reviews: comparative performance of Abstrackr and EPPI-Reviewer. *Syst Rev* [Internet]. 2020 Dec;9(1). Available from: <http://dx.doi.org/10.1186/s13643-020-01324-7>
3. Devlin J, Chang M-W, Lee K, Toutanova K. BERT: Pre-training of deep bidirectional Transformers for language understanding. 2018; Available from: <http://dx.doi.org/10.48550/ARXIV.1810.04805>
4. Kataoka Y, Taito S, Yamamoto N, So R, Tsutsumi Y, Anan K, et al. An open competition involving thousands of competitors failed to construct useful abstract classifiers for new diagnostic test accuracy systematic reviews. *Res Synth Methods* [Internet]. 2023 Jun 20; Available from: <http://dx.doi.org/10.1002/jrsm.1649>
5. OpenAI. GPT-4 Technical Report [Internet]. arXiv [cs.CL]. 2023. Available from: <http://arxiv.org/abs/2303.08774>
6. Zhao WX, Zhou K, Li J, Tang T, Wang X, Hou Y, et al. A survey of large language models [Internet]. arXiv [cs.CL]. 2023 [cited 2023 Oct 27]. Available from: <http://arxiv.org/abs/2303.18223>
7. Demszky D, Yang D, Yeager DS, Bryan CJ, Clapper M, Chandhok S, et al. Using large language models in psychology. *Nat Rev Psychol* [Internet]. 2023 Oct 13; Available from: <http://dx.doi.org/10.1038/s44159-023-00241-5>
8. Wei J, Wang X, Schuurmans D, Bosma M, Ichter B, Xia F, et al. Chain-of-thought prompting elicits reasoning in large language models [Internet]. arXiv [cs.CL]. 2022. Available from: <http://arxiv.org/abs/2201.11903>
9. Kojima T, Gu SS, Reid M, Matsuo Y, Iwasawa Y. Large Language Models are Zero-Shot Reasoners [Internet]. arXiv [cs.CL]. 2022. Available from: <http://arxiv.org/abs/2205.11916>
10. Yu F, Zhang H, Tiwari P, Wang B. Natural language reasoning, A survey [Internet]. arXiv [cs.CL]. 2023. Available from: <http://arxiv.org/abs/2303.14725>
11. Matsui K, Utsumi T, Aoki Y, Maruki T, Takeshima M, Yoshikazu T. Large language model demonstrates human-comparable sensitivity in initial screening of systematic

- reviews: A semi-automated strategy using GPT-3.5 [Internet]. 2023. Available from: <http://dx.doi.org/10.2139/ssrn.4520426>
12. Cohen JF, Korevaar DA, Altman DG, Bruns DE, Gatsonis CA, Hooft L, et al. STARD 2015 guidelines for reporting diagnostic accuracy studies: explanation and elaboration. *BMJ Open*. 2016 Nov;6(11):e012799.
  13. Collins GS, Reitsma JB, Altman DG, Moons KGM. Transparent Reporting of a multivariable prediction model for Individual Prognosis or Diagnosis (TRIPOD): the TRIPOD statement. *Ann Intern Med*. 2015 Jan 6;162(1):55–63.
  14. COVID-19: Living systematic map of the evidence [Internet]. [cited 2023 Oct 26]. Available from: <https://eppi.ioe.ac.uk/cms/Projects/DepartmentofHealthandSocialCare/Publishedreviews/COVID-19Livingssystematicmapofthevidence/tabid/3765/Default.aspx>
  15. Tsujimoto Y, Kumasawa J, Shimizu S, Nakano Y, Kataoka Y, Tsujimoto H, et al. Doppler trans-thoracic echocardiography for detection of pulmonary hypertension in adults. *Cochrane Database Syst Rev*. 2022 May 9;5(5):CD012809.
  16. Someko H, Okazaki Y, Tsujimoto Y, Ishikane M, Kubo K, Kakehashi T. Diagnostic accuracy of rapid antigen tests in cerebrospinal fluid for pneumococcal meningitis: a systematic review and meta-analysis. *Clin Microbiol Infect*. 2023 Mar;29(3):310–9.
  17. Azure OpenAI Service [Internet]. [cited 2023 Oct 10]. Available from: <https://learn.microsoft.com/ja-jp/azure/ai-services/openai/overview>
  18. azure-sdk. CompletionsOptions.Temperature property [Internet]. [cited 2023 Oct 10]. Available from: <https://learn.microsoft.com/en-us/dotnet/api/azure.ai.openai.completionsoptions.temperature?view=azure-dotnet-preview>
  19. Glanville J, Kotas E, Featherstone R, Dooley G. Which are the most sensitive search filters to identify randomized controlled trials in MEDLINE? *J Med Libr Assoc*. 2020 Oct 1;108(4):556–63.
  20. Bethel AC, Rogers M, Abbott R. Use of a search summary table to improve systematic review search methods, results, and efficiency. *J Med Libr Assoc*. 2021 Jan 1;109(1):97–106.
  21. Ouyang S, Zhang JM, Harman M, Wang M. LLM is like a box of chocolates: The non-determinism of ChatGPT in code generation. 2023; Available from: <http://dx.doi.org/10.48550/ARXIV.2308.02828>
  22. Kataoka Y, So R. Benefits, limits, and risks of GPT-4 as an AI chatbot for medicine. *N Engl J Med*. 2023 Jun 22;388(25):2399.

23. OpenAI platform [Internet]. [cited 2023 Oct 10]. Available from: <https://platform.openai.com/docs/guides/gpt/why-are-model-outputs-inconsistent>
24. Bisong E. Google Colaboratory. In: Building Machine Learning and Deep Learning Models on Google Cloud Platform. Berkeley, CA: Apress; 2019. p. 59–64.
25. Clinical usefulness of cerebrospinal fluid bacterial antigen studies. J Pediatr [Internet]. Available from: [https://doi.org/10.1016/s0022-3476\(94\)70201-2](https://doi.org/10.1016/s0022-3476(94)70201-2)
26. Study of bacterial meningitis in children below 5 years with comparative evaluation of gram staining, culture and bacterial antigen detection. J Clin Diagn Res [Internet]. Available from: <https://doi.org/10.7860/JCDR/2014/6767.4215>
27. Matubu A, Rusakaniko S, Robertson V, Gwanzura L. Etiology and risk factors of meningitis in patients admitted at a Central Hospital in Harare. Cent Afr J Med. 2015 Jan;61(1–4):5–11.
28. Ramachandran P, Fitzwater SP, Aneja S, Verghese VP, Kumar V, Nedunchelian K, et al. Prospective multi-centre sentinel surveillance for Haemophilus influenzae type b & other bacterial meningitis in Indian children. Indian J Med Res. 2013 Apr;137(4):712–20.
29. Belur J, Tompson L, Thornton A, Simon M. Interrater reliability in systematic review methodology: Exploring variation in coder decision-making. Sociol Methods Res. 2021 May;50(2):837–65.
30. Suzuki E, Tsuda T, Mitsuhashi T, Mansournia MA, Yamamoto E. Errors in causal inference: an organizational schema for systematic error and random error. Ann Epidemiol. 2016 Nov;26(11):788-793.e1.
31. Yang C, Wang X, Lu Y, Liu H, Le QV, Zhou D, et al. Large Language Models as Optimizers [Internet]. arXiv [cs.LG]. 2023. Available from: <http://arxiv.org/abs/2309.03409>
32. Zhou Y, Muresanu AI, Han Z, Paster K, Pitis S, Chan H, et al. Large language models are human-level prompt engineers [Internet]. arXiv [cs.LG]. 2022. Available from: <http://arxiv.org/abs/2211.01910>
33. Chen L, Chen J, Goldstein T, Huang H, Zhou T. InstructZero: Efficient instruction optimization for black-box large language models [Internet]. arXiv [cs.AI]. 2023. Available from: <http://arxiv.org/abs/2306.03082>
34. Chen J, Chen L, Huang H, Zhou T. When do you need Chain-of-Thought Prompting for ChatGPT? [Internet]. arXiv [cs.AI]. 2023. Available from: <http://arxiv.org/abs/2304.03262>

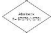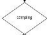

Trained responses on 10000 trials

Tested responses

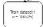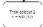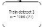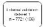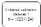

Step 1: Development of a meta-prompt for selecting DTR abstracts (GPT-3.5, temperature = 0)

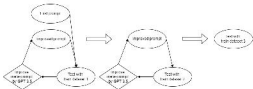

Step 2: Explore the optimal temperature (GPT-3.5, different temperatures)

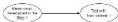

Step 3: External validation (GPT-3.5 or GPT-4)

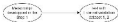

Step 4: Check for reproducibility (GPT-3.5 or GPT-4)

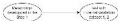



Level  
Management - (1000 - 20000) - Temperature

FIGURE 2 SYSTEMS CONTROL. Process logic diagrams and associated studies from required elements. This abstract was taken from the report.

1988  
AD-88-1407  
UNIVERSITY OF MICHIGAN

OPT 3.5 hours

Level  
Management (1000 - 20000)

Level
